# Supplementary material for: Genome-wide association study identifies CD1A associated with rate of increase in plasma neurofilament light in non-demented elders
Source: PubMed Central journal article supplement (PMC6660034; doi:10.18632/aging.102066), 2019-07-11
Supplement: aging-11-102066-s001.pdf [file aging-11-102066-s001.pdf]

## SUPPLEMENTARY TABLES

**Supplementary Table 1. Suggestive SNPs in GWAS.**

| CHR | BP       | SNP        | MAF    | Closest Gene        | SNP Type/Location | P values |
|-----|----------|------------|--------|---------------------|-------------------|----------|
| 17  | 18055903 | rs74361457 | 0.017  | <i>MYO15A</i>       | intron            | 9.52E-07 |
| 17  | 80461935 | rs8078417  | 0.31   | <i>NARF</i>         | intergenic        | 1.75E-06 |
| 7   | 66903871 | rs62465226 | 0.354  | <i>LOC105375337</i> | intergenic        | 2.51E-06 |
| 7   | 66904395 | rs6948216  | 0.393  | <i>LOC105375337</i> | intergenic        | 2.51E-06 |
| 7   | 66908992 | rs4618582  | 0.404  | <i>LOC105375337</i> | intergenic        | 2.51E-06 |
| 7   | 66902955 | rs7785167  | 0.413  | <i>STAG3L4</i>      | intergenic        | 3.16E-06 |
| 7   | 66898482 | rs4357188  | 0.355  | <i>STAG3L4</i>      | intergenic        | 4.05E-06 |
| 7   | 66901317 | rs12666354 | 0.358  | <i>LOC105375337</i> | intergenic        | 4.05E-06 |
| 17  | 18227081 | rs921986   | 0.323  | <i>SMCR8</i>        | intron            | 6.27E-06 |
| 17  | 18164404 | rs2605142  | 0.2963 | <i>MIEF2</i>        | intron            | 8.30E-06 |
| 17  | 18228605 | rs4925172  | 0.324  | <i>SMCR8</i>        | intron            | 9.11E-06 |
| 17  | 18231998 | rs1979276  | 0.324  | <i>SHMT1</i>        | intron            | 9.11E-06 |
| 7   | 66896600 | rs6460344  | 0.127  | <i>LOC105375337</i> | intergenic        | 9.35E-06 |

Abbreviations: BP, base pair (variant position); CHR, chromosome; MAF, minor allele frequency; SNP, single nucleotide polymorphism

**Supplementary Table 2. Baseline demographic characteristics and rs16840041 genotypes as predictors of time to clinical disease progression.**

| Characteristic | Hazard ratio (95% CI) | Wald $\chi^2$ 1 | p value |
|----------------|-----------------------|-----------------|---------|
| genotype       | 1.63(1.12–2.36)       | 6.60            | 0.010   |
| age            | 1.03(1.01–1.05)       | 6.66            | 0.010   |
| diagnosis      | 1.45(1.24–1.70)       | 20.63           | <0.001  |
| <i>APOE4</i> + | 1.72(1.36–2.05)       | 24.04           | <0.001  |

Cox proportional hazard models were used to assess the ability of demographic variables (age, diagnosis, and *APOE4* status) to predict clinical disease progression of AD over the 1-10 year follow-up period.

Abbreviations: CI, confidence intervals; *APOE*, apolipoprotein E.
